# Supplementary material
Source: publisher site journal article supplement (https://www.spandidos-publications.com/2459/downloadSupplementary)
Supplement: Supplementary file 1 [file downloadSupplementary]

Figure S1. Successful overexpression of miR-423-5p and downregulation of NACC1 in MCL cells. (A) Relative expression of miR-43-5p in JVM-2 cells after transfection with miR-423-5p mimics and miR-NC plasmid evaluated by quantitative real-time PCR. (B) NACC1 at the protein level in JVM-2 cells transfected with siNACC1 plasmid as assessed by western blotting. Data are presented as mean  $\pm$  SD of three independent experiments. \*\*\* $P$ <0.001. MCL, mantle cell lymphoma; NACC1, nucleus accumbens-associated 1.

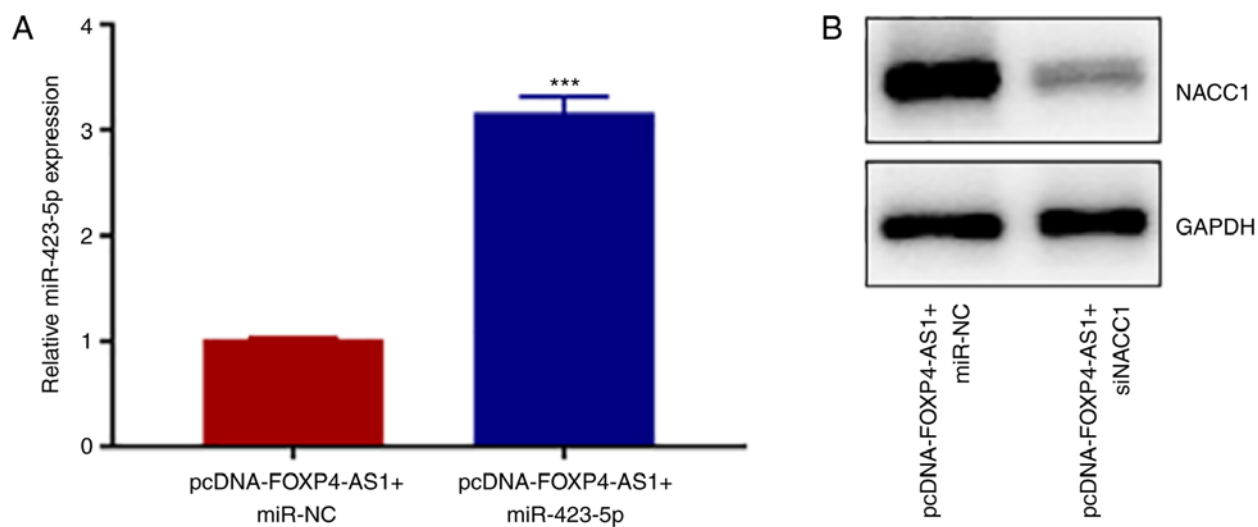

Table SI. The sequences of PCR primers.

| Name       |         | Sequence (5'-3')        |
|------------|---------|-------------------------|
| FOXP4-AS1  | Forward | GTGAGCTTCTGGGTTCGACA    |
|            | Reverse | ATTGAGGGTTAGGGCAGCAC    |
| miR-423-5p | Forward | TCCGTGCAAAGTGGTATCCT    |
|            | Reverse | TCGCTTCGTCAAACACTGTC    |
| NACC1      | Forward | CTCTCCCGGCTGAACTTATCAAC |
|            | Reverse | GTACACGTTGGTGCCTGTCAC   |
| GAPDH      | Forward | CCTTCATTGACCTCAACTACA   |
|            | Reverse | GCTCCTGGAAGATGGTGAT     |
| U6         | Forward | CTCGCTTCGGCAGCACATATACT |
|            | Reverse | ACGCTTCACGAATTTGCGTGTC  |
